# Supplementary material for: TMS-Induced Central Motor Conduction Time at the Non-Infarcted Hemisphere Is Associated with Spontaneous Motor Recovery of the Paretic Upper Limb after Severe Stroke
Source: MDPI journal article supplement (doi:10.3390/brainsci11050648), 2021-05-15
Supplement: s1 [file s1]

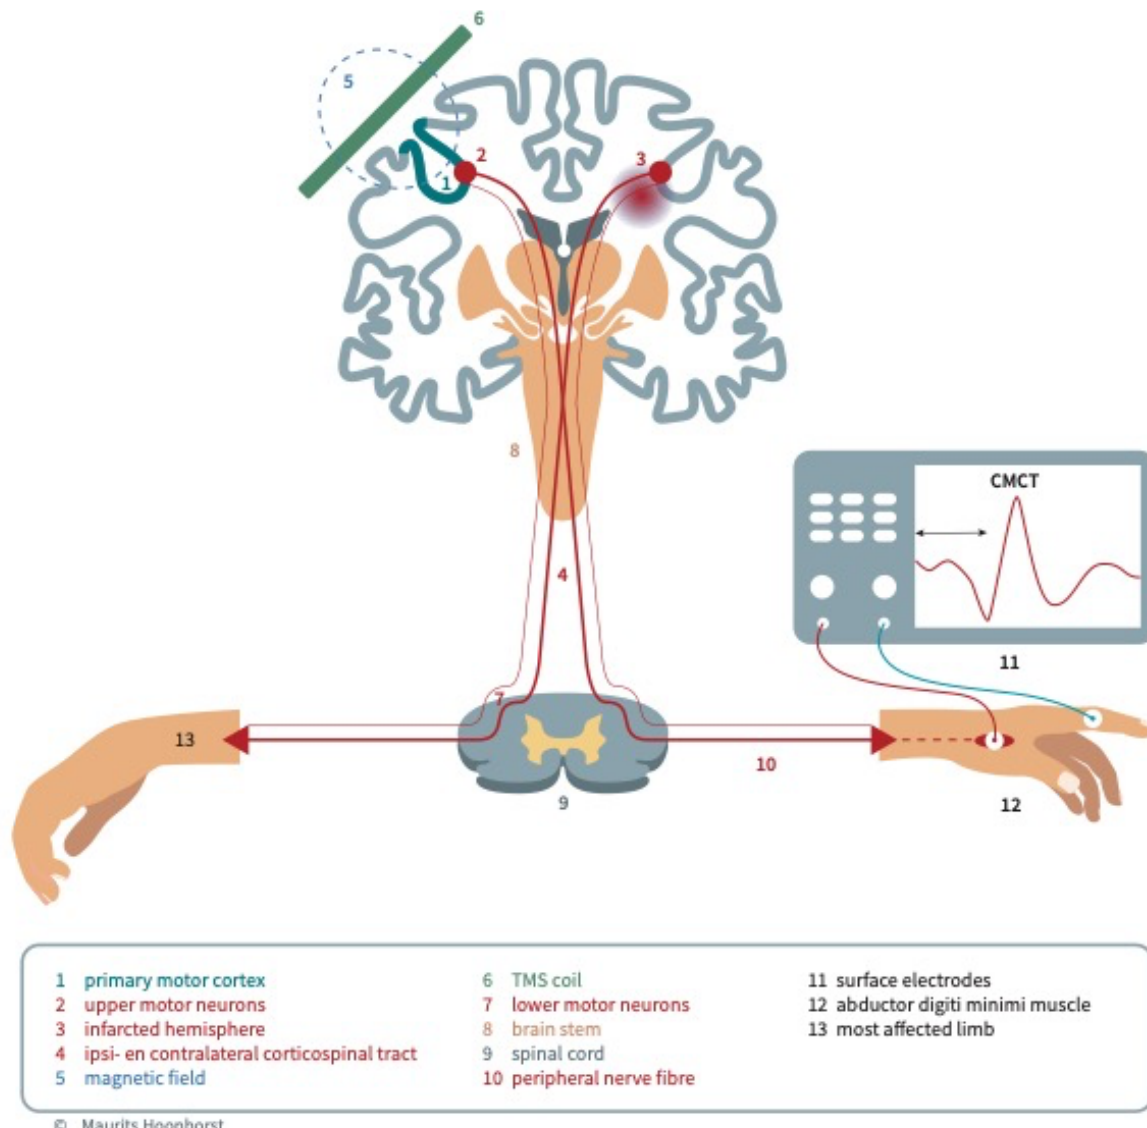

*Note. Simplified mechanism of action of Transcranial Magnetic Stimulation (TMS) of the motor cortex at the non-infarcted hemisphere as performed in our study.*

*TMS applied over the motor cortex preferentially excite interneurons of the cortical surface. This placement leads to a transsynaptic activation of pyramidal cells evoking descending volleys in the contralateral corticospinal tract. Motoneuron activation in response to TMS-induced corticospinal volleys leads to a contraction in the target muscle, evoking a motor-evoked potential on electromyography recorded by using surface electrodes applied over the muscle belly of the adductor digit minimi muscle of the less affected limb. Thereafter, CMCT at the non-infarcted hemisphere can be calculated.*
